# Supplementary material
Source: publisher figshare collection journal article supplement (https://tandf.figshare.com/ndownloader/files/36009324)
Supplement: Supplementary file 1 [file 36009324]

**SUPPLEMENTARY MATERIAL**

**Two new aspidosperma-type alkaloids from *Ervatamia officinalis***

**List of Supplemental Material**

Figure S1. HR-ESI-MS spectrum of **1**

Figure S2. UV spectrum of **1** (MeOH)

Figure S3. IR spectrum of **1** (KBr disc)

Figure S4. 1H NMR (400 MHz, DMSO-*d6*) of **1**

Figure S5. 13C NMR (100 MHz, DMSO-*d6*) of **1**

Figure S6. DEPT-135 spectrum (100 MHz, DMSO-*d6*) of **1**

Figure S7. HSQC spectrum (400 MHz, DMSO-*d6*) of **1**

Figure S8. 1H-1H COSY spectrum (400 MHz, DMSO-*d6*) of **1**

Figure S9. HMBC spectrum (400 MHz, DMSO-*d6*) of **1**

Figure S10: NOESY spectrum (400 MHz, DMSO-*d6*) of **1**

Figure S11. HR-ESI-MS spectrum of **2**

Figure S12. UV spectrum of **2** (MeOH)

Figure S13. IR spectrum of **2** (KBr disc)

Figure S14. 1H NMR (400 MHz, DMSO-*d6*) of **2**

Figure S15. 13C NMR (100 MHz, DMSO-*d6*) of **2**

Figure S16. DEPT-135 spectrum (100 MHz, DMSO-*d6*) of **2**

Figure S17. HSQC spectrum (400 MHz, DMSO-*d6*) of **2**

Figure S18. 1H-1H COSY spectrum (400 MHz, DMSO-*d6*) of **2**

Figure S19. HMBC spectrum (400 MHz, DMSO-*d6*) of **2**

Figure S20: NOESY spectrum (400 MHz, DMSO-*d6*) of **2**


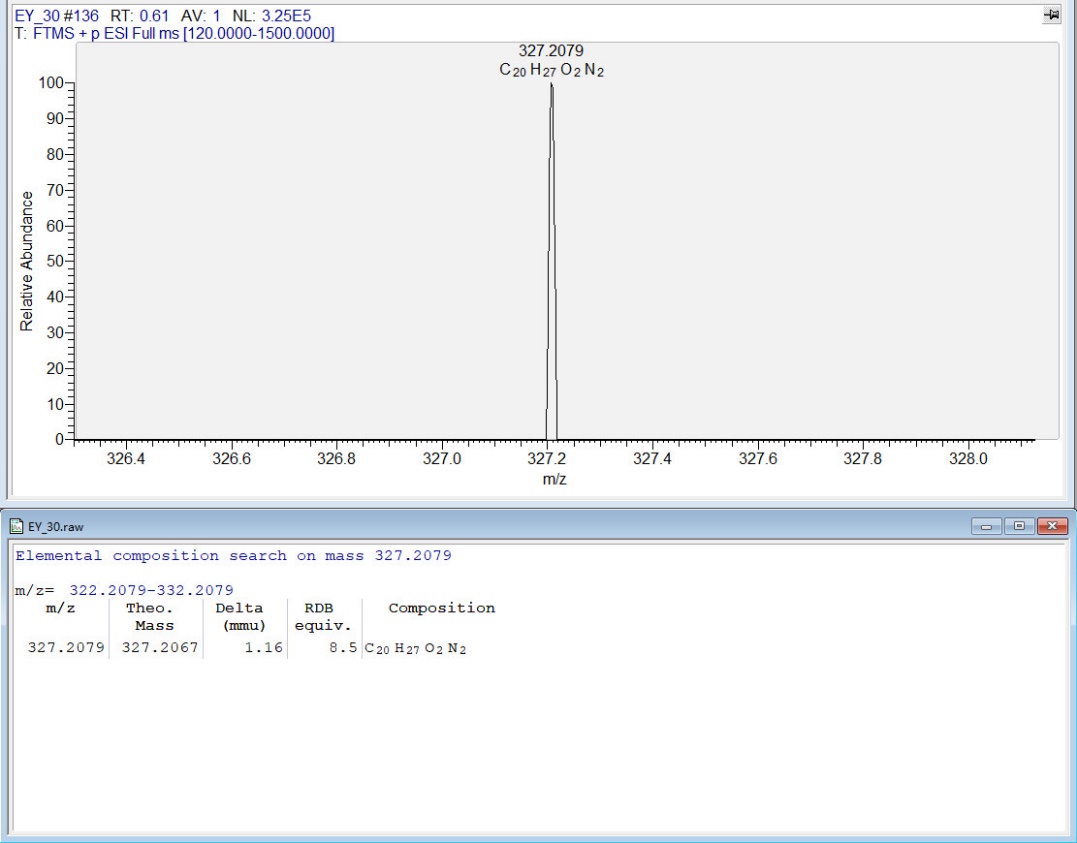


Figure S1. HR-ESI-MS spectrum of **1**


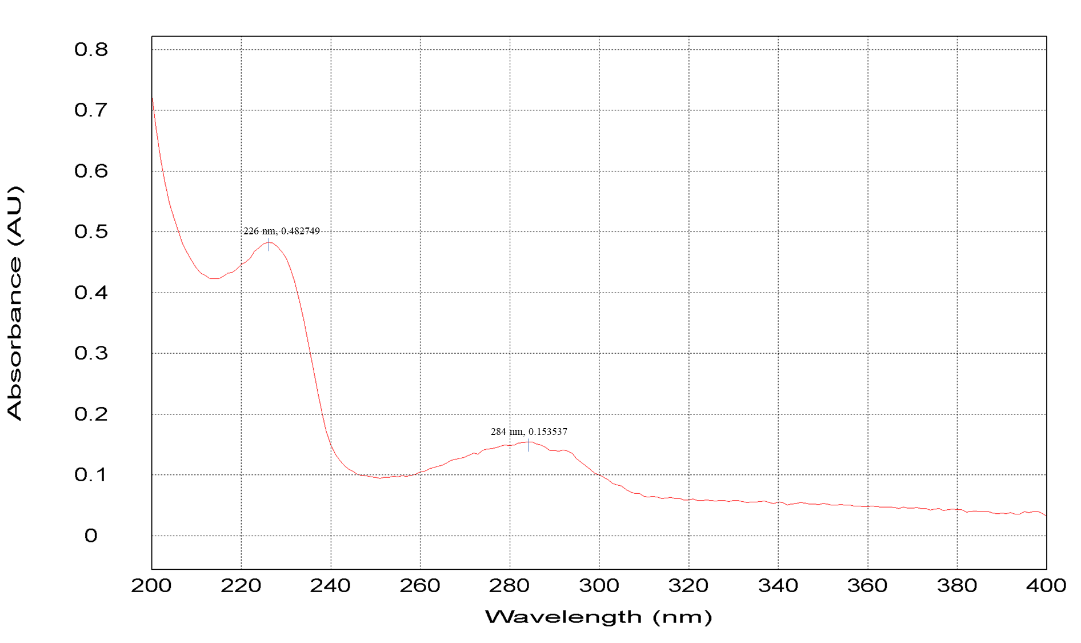


Figure S2. UV spectrum of **1** (MeOH)


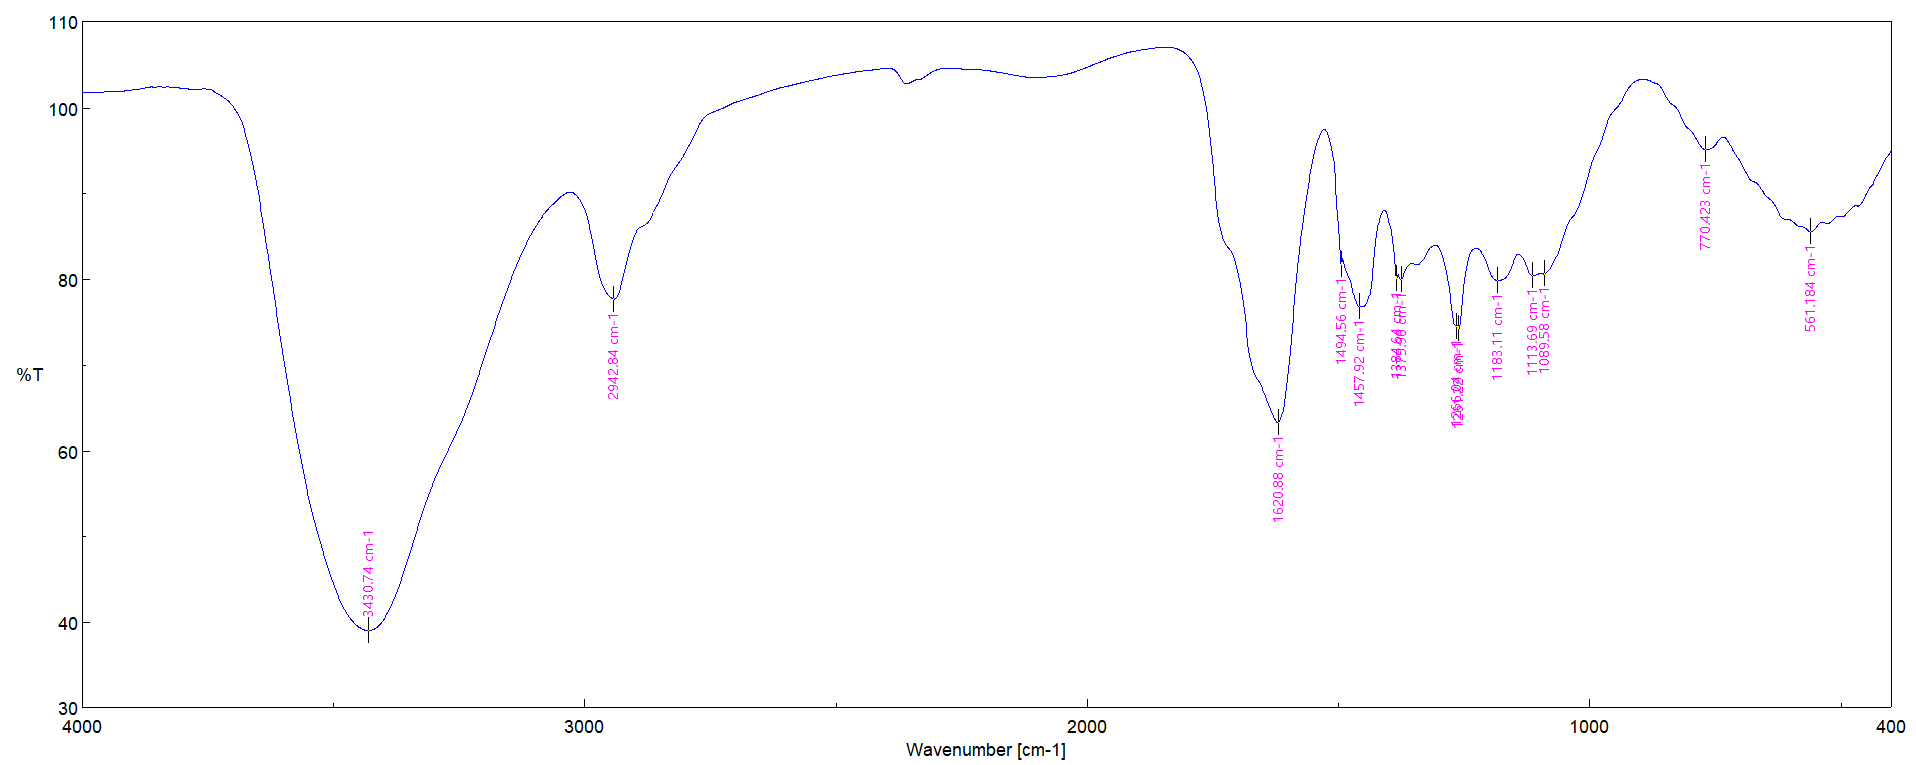


Figure S3. IR spectrum of **1** (KBr disc)

Figure S4. 1H NMR spectrum (400 MHz, DMSO-*d6*) of **1**

Figure S5. 13C NMR spectrum (100 MHz, DMSO-*d6*) of **1**

Figure S6. DEPT-135 spectrum (100 MHz, DMSO-*d6*) of **1**

Figure S7. HSQC spectrum (400 MHz, DMSO-*d6*) of **1**

Figure S8. 1H-1H COSY spectrum (400 MHz, DMSO-*d6*) of **1**

Figure S9. HMBC spectrum (400 MHz, DMSO-*d6*) of **1**

Figure S10: NOESY spectrum (400 MHz, DMSO-*d6*) of **1**


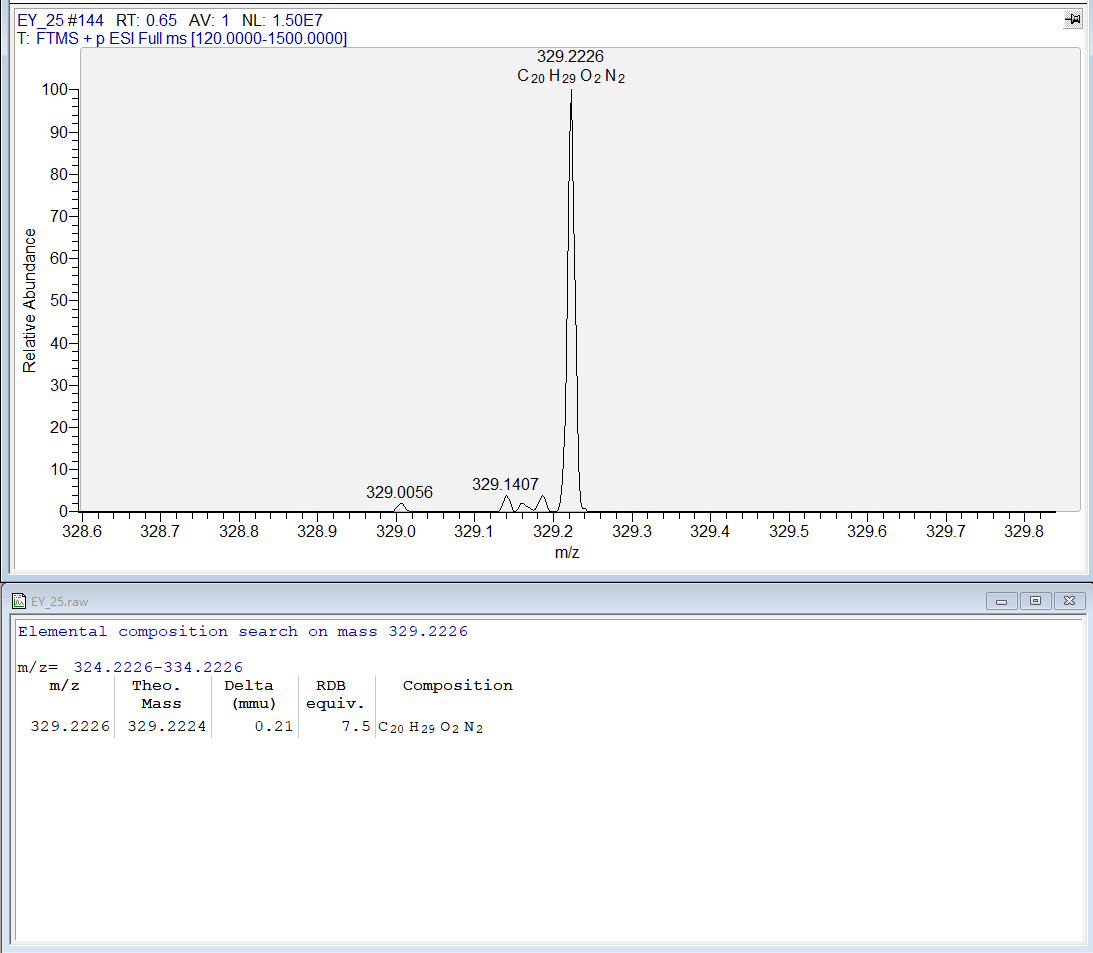


Figure S11. HR-ESI-MS spectrum of **2**


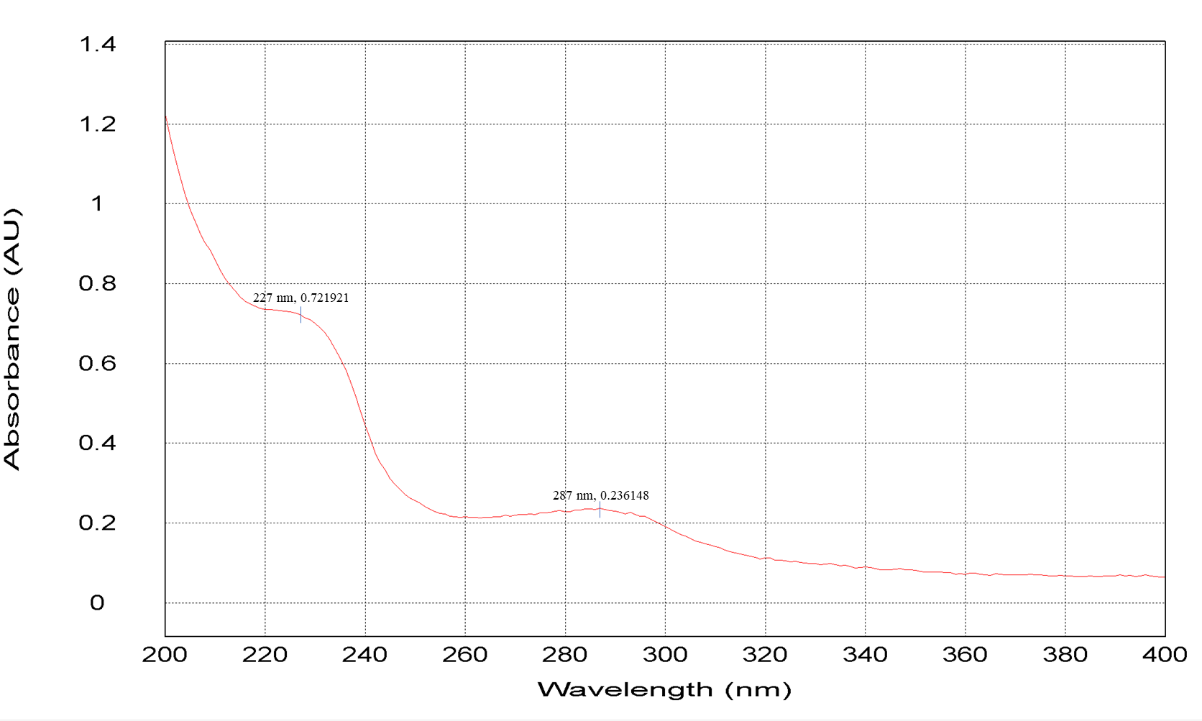


Figure S12. UV spectrum of **2** (MeOH)


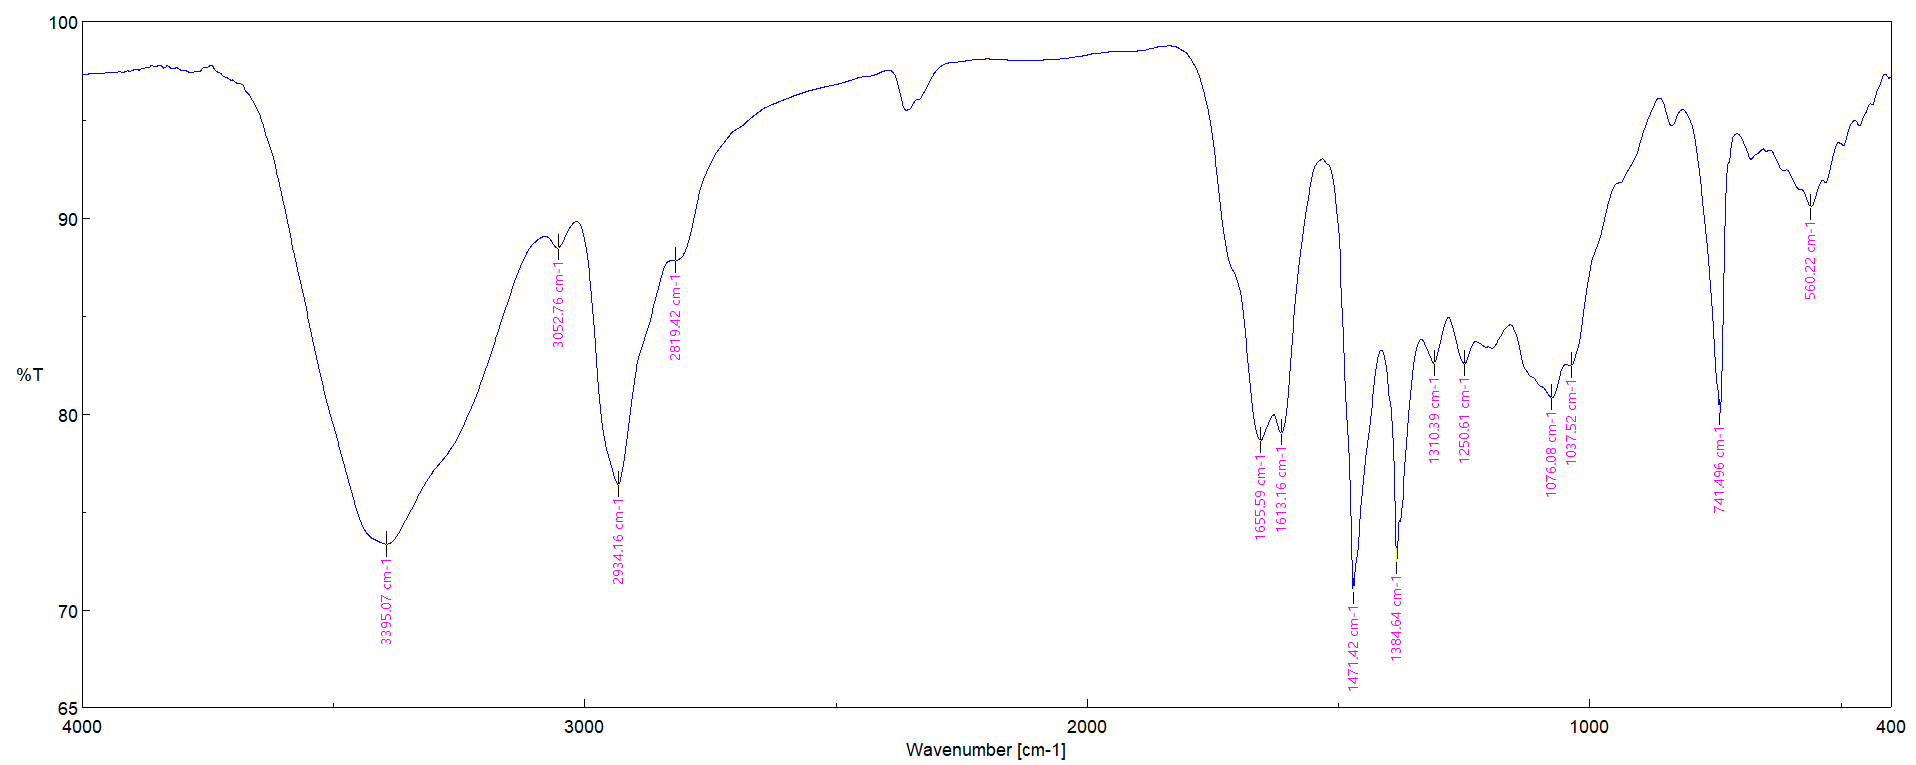


Figure S13. IR spectrum of **2** (KBr disc)

Figure S14. 1H NMR spectrum (400 MHz, DMSO-*d6*) of **2**

Figure S15. 13C NMR spectrum (100 MHz, DMSO-*d6*) of **2**

Figure S16. DEPT-135 spectrum (100 MHz, DMSO-*d6*) of **2**

Figure S17. HSQC spectrum (400 MHz, DMSO-*d6*) of **2**

Figure S18. 1H-1H COSY spectrum (400 MHz, DMSO-*d6*) of **2**

Figure S19. HMBC spectrum (400 MHz, DMSO-*d6*) of **2**

Figure S20: NOESY spectrum (400 MHz, DMSO-*d6*) of **2**
